# Supplementary material for: Radiocarbon dating of alpine ice cores with the dissolved organic carbon (DOC) fraction
Source: Copernicus journal article supplement (doi:10.5194/tc-2020-234), 2020-09-02
Supplement: Supplementary file 1 [file tc-2020-234-supplement.pdf]

1 *Supplement of*

2 **Radiocarbon dating of alpine ice cores with the dissolved organic carbon (DOC)**

3 **fraction**

4 Fang Ling et al.

5 *Correspondence to:* Theo M. Jenk (theo.jenk@psi.ch)

6

7 Contents of this file

8 ● Model for carbonates removal efficiency estimation

9 ● Figures S1 to S3

10 ● References

11

12

13 **Estimation of the carbonate removal efficiency for WIOC samples**

14 To test if incomplete removal of carbonates can potentially explain the  $F^{14}C$  DOC-WIOC offset  
15 observed in our dataset, we estimated the carbonate removal efficiency of our procedure. We  
16 applied the following model, based on isotopic mass balance:

17 
$$F^{14}C_{WIOC} = \frac{m_{meas} * F^{14}C_{meas} - m_{res.carb} * F^{14}C_{carb}}{m_{meas} - m_{res.carb}}, \quad (1)$$

18 where  $F^{14}C_{WIOC}$  denotes the true value of the sampled WIOC,  $m_{meas}$  and  $F^{14}C_{meas}$  the measured  
19 carbon mass and  $F^{14}C$ ,  $m_{res.carb}$  and  $F^{14}C_{carb}$  the mass and  $F^{14}C$  of residual carbonate carbon on  
20 the filter (assuming an average value of 0.1 corresponding to an age of ~20 ka; Amundson et  
21 al., 1994). With

22 
$$m_{res.carb} = c_{Ca^{2+}} * 0.3 * 0.5 * m_{ice} * (1 - x_{eff}), \quad (2)$$

23 where  $c_{Ca^{2+}}$  is the mean  $Ca^{2+}$  concentration in the analyzed samples, 0.3 the ratio of the atomic  
24 weights of carbon (12 amu) and Ca (40 amu), 0.5 the assumed fraction of airborne Ca  
25 associated with carbonate (Meszaros, 1966),  $m_{ice}$  the ice sample mass. The WIOC carbonate  
26 removal efficiency,  $x_{eff}$ , was assumed to be the same for all our samples from the four different  
27 sites.  $x_{eff}$  was finally derived in a least square approach by minimizing the difference between

28  $F^{14}\text{C-DOC}$  and  $F^{14}\text{C}_{\text{WIOC}}$ . Due to the lack of carbonate concentration data,  $\text{Ca}^{2+}$  concentrations  
29 are here used as a tracer of calcium carbonate instead (or if also not measured, the available,  
30 most representative data for the respective glacier; see main manuscript Table 3). Calcium  
31 carbonate is the most common geological form, occurring e.g. as calcite ( $\text{CaCO}_3$ ), aragonite  
32 ( $\text{CaCO}_3$ ) or dolomite ( $\text{CaMg}(\text{CO}_3)_2$ ).

33 The so derived estimate of an average removal efficiency of ~96 % would amount to an average  
34 residual carbonate carbon amount on the WIOC filter of ~4  $\mu\text{gC}$  (see main manuscript Table  
35 3). We tested this value for its robustness. By selecting different values for the two critical  
36 parameters  $F^{14}\text{C}_{\text{carb}}$  and the assumed fraction of airborne Ca associated with carbonate, e.g.  
37 0.05 (corresponding to an age of ~30 ka) and 0.8, respectively, the resulting average removal  
38 efficiency varies by only +1 %. If allowing  $x_{\text{eff}}$  to vary dependent on the sampling site, a nearly  
39 perfect match between  $F^{14}\text{C DOC-WIOC}$  can be achieved for all samples including Chongce  
40 (average  $x_{\text{eff}} = 95$  % with a 4 % variability, the average residual carbonate carbon amount is  
41 slightly lower in this case, amounting to  $3 \pm 1.5$   $\mu\text{gC}$ ). With this model set-up, the highest  
42 removal efficiency is estimated for the samples from the Belukha ice core with 99%.

43

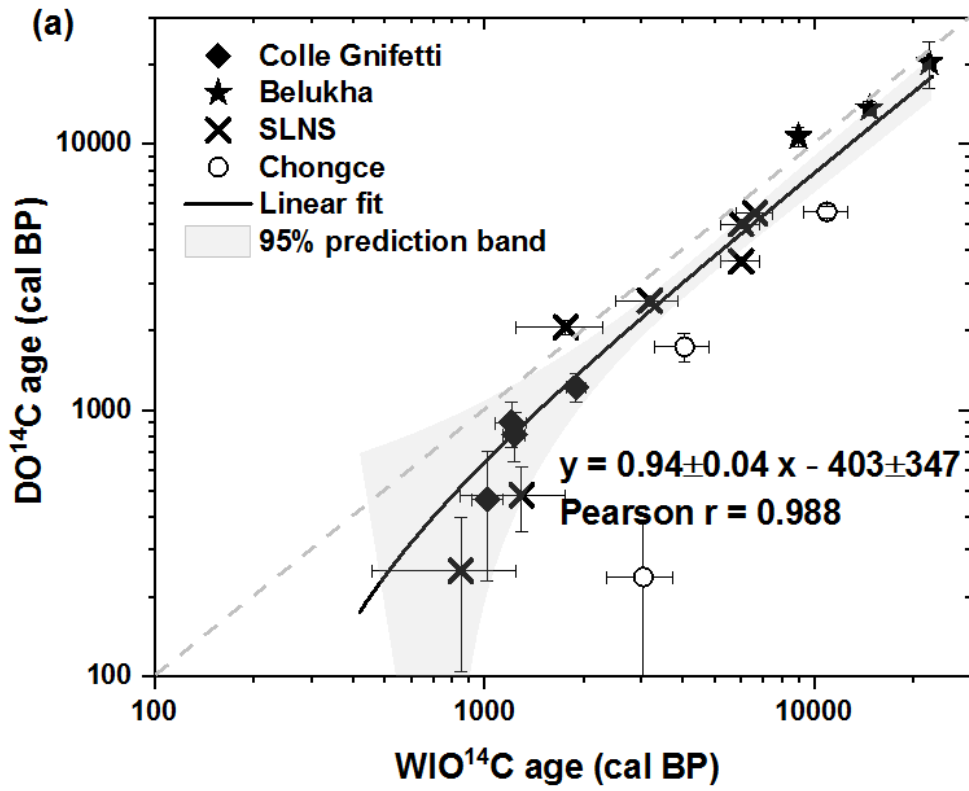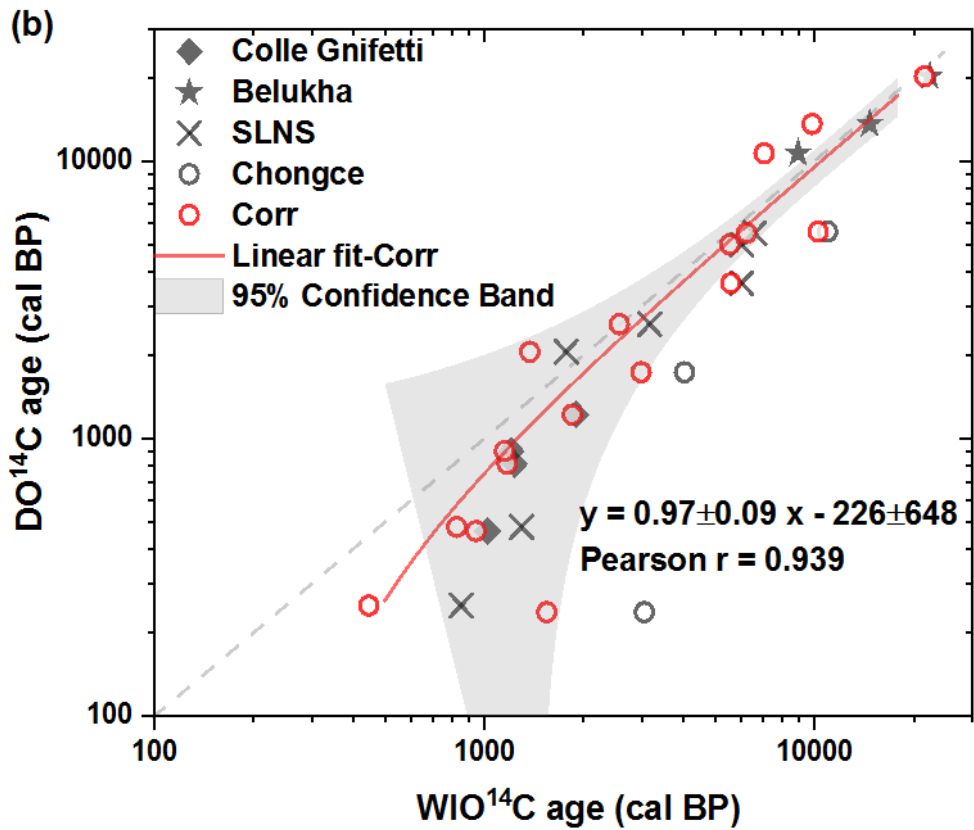

47 **Figure S1.** Comparison between calibrated <sup>14</sup>C ages of the DOC and WIOC fractions in (a)  
 48 and after accounting for the effect of residual carbonates to WIO<sup>14</sup>C ages (b). For the linear fits  
 49 shown, the original data from Chongce (open symbols) is excluded in (a) but is included when  
 50 carbonate contribution was accounted for in (b).

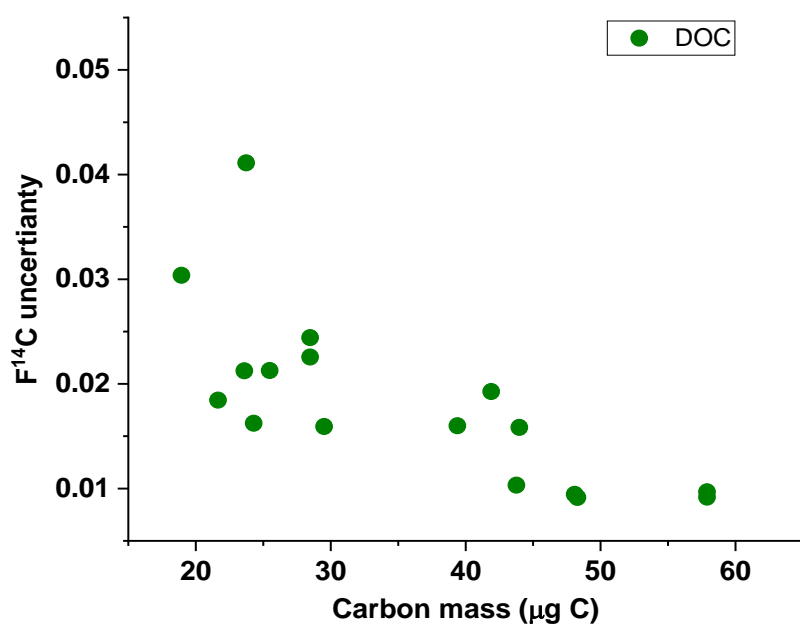

51  
52 **Figure S2** Analytical F<sup>14</sup>C 1σ uncertainty for DOC versus sample carbon mass.

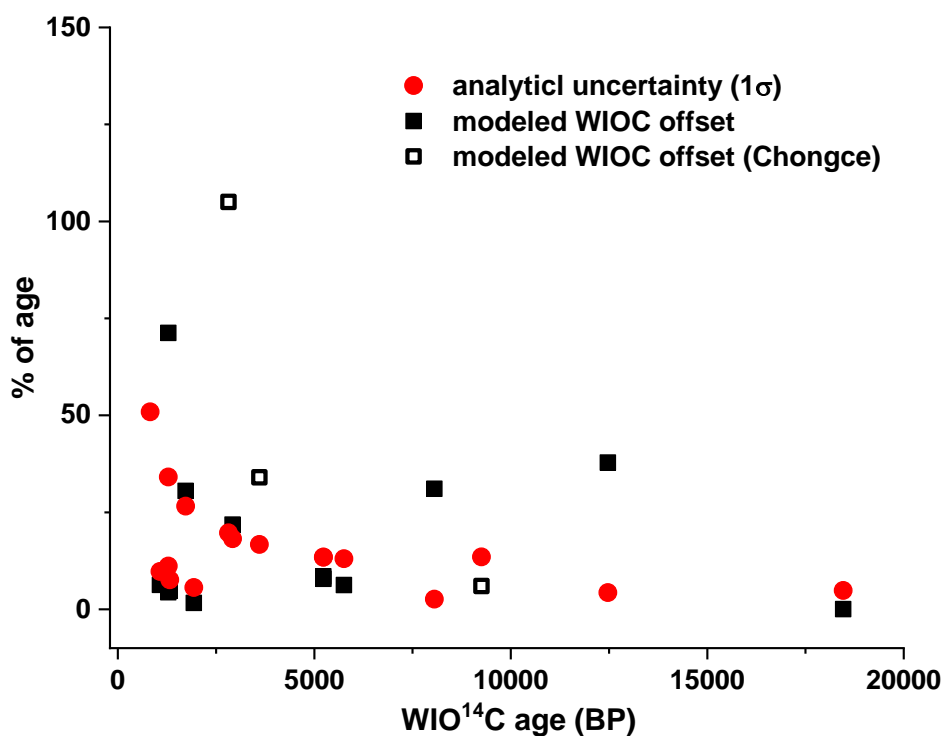

53  
54 **Figure S3** Modeled <sup>14</sup>C age offset in the WIOC fraction associated with contribution from  
55 residual carbonate carbon (squares; open squares for Chongce) and the WIO<sup>14</sup>C dating  
56 uncertainty (1σ, red dots) for each sample as percentage of the respective age versus the  
57 WIO<sup>14</sup>C age.

58 **References**

59 Amundson, R., Wang, Y., Chadwick, O., Trumbore, S., McFadden, L., McDonald, E., Wells,  
60 S. and DeNiro, M., Factors and processes governing the <sup>14</sup>C content of carbonate in desert  
61 soils. *Earth and Planetary Science Letters*, 125, 385-405, 1994.

62 Meszaros E., On the origin and composition of atmospheric calcium compounds, *Tellus*, 18:2-  
63 3, 262-265, DOI: 10.3402/tellusa.v18i2-3.9627, 1966.
